# Supplementary material for: Novel rapid identification of Severe Acute Respiratory Syndrome Coronavirus 2 (SARS-CoV-2) by real-time RT-PCR using BD Max Open System in Taiwan
Source: PeerJ. 2020 Jun 17;8:e9318. doi: 10.7717/peerj.9318 (PMC7305773; doi:10.7717/peerj.9318)
Supplement: Supplemental Information 1 [file peerj-08-9318-s001.xlsx]

## Sheet: 工作表1
	Interrun				Intrarun
	+++				+++
	E gene	R gene			E gene	R gene
	15.4	18.1			15.4	19.3
	16.1	16.4			17.2	16.3
	13.9	15.7			16.8	15.7
	14.7	16.7			18	16.7
	16.1	18.3			16.6	18.3
Average	15.24	17.04		Average	16.8	17.26
Std	0.947629	1.12161		Std	0.948683	1.49265
CV	0.0621804	0.0658219		CV	0.0564692	0.0864802
	++				++
	E gene	R gene			E gene	R gene
	24.4	26.7			24.8	27.6
	25.1	27			26	27.1
	26	26.8			25.4	27.6
	24.8	25			25.8	26.3
	25	26			24.7	26
Average	25.06	26.3		Average	25.34	26.92
Std	0.589915	0.818535		Std	0.581378	0.739594
CV	0.0235401	0.031123		CV	0.0229431	0.0274738
	+				+
	E gene	R gene			E gene	R gene
	34.7	36.6			36	37
	34.6	36.8			35	36.8
	35	37.4			36	37
	35.3	36.6			34.9	37.9
	33.8	36.3			34.8	37.3
Average	34.68	36.74		Average	35.34	37.2
Std	0.563028	0.409878		Std	0.60663	0.430116
CV	0.0162349	0.0111562		CV	0.0171655	0.0115623
