# Supplementary material for: Novel rapid identification of Severe Acute Respiratory Syndrome Coronavirus 2 (SARS-CoV-2) by real-time RT-PCR using BD Max Open System in Taiwan
Source: PeerJ. 2020 Jun 17;8:e9318. doi: 10.7717/peerj.9318 (PMC7305773; doi:10.7717/peerj.9318)
Supplement: Supplemental Information 2 [file peerj-08-9318-s002.xlsx]

## Sheet: e gene
E gene	LDT	BD MAX
5091	27.2	32
5123	22.8	25.8
5124	19.39	20.6
5317	16.9	19
5327	31.34	32.2
5701	19.65	21.3
5569	24.85	26.1
5460	25.76	25.3
5476	24.81	26.9
5519	28.96	29.6
4437	18.3	18.4
4457	28.2	29.3
4339	18.1	19.4
4892	30.02	29.8
4668	26.8	28.1
4867	20	20
4691	18.4	19.1
3586	17.4	16.4
3585	25.7	25.5
3614	21.5	19.7
3782	17.7	20.3
3767	32	31.7
3824	24.4	25.3
3917	27.1	27.1
3997	32.3	32.5
4091	21	21.3
4092	27.1	27.5
4215	15	16.1
	LDT	BD MAX-E	rank LDT	rank BD MAX
	27.2	32	3	2
	22.8	25.8	7	6
	19.39	20.6	9	9
	16.9	19	10	10
	31.34	32.2	1	1
	19.65	21.3	8	8
	24.85	26.1	5	5
	25.76	25.3	4	7
	24.81	26.9	6	4
	28.96	29.6	2	3
		Spearman correlation	0.90303

## Sheet: rdrp gene
Rdrp gene	LDT	BD MAX
5091	28.5	35.3
5123	23.1	31.1
5124	19.95	25.1
5317	19.2	23
5327	31.6	34.1
5701	21.01	24.2
5569	24.93	29.3
5460	26.27	28.2
5476	26.27	30.5
5519	29.32	32.8
4437	18.3	20
4457	28.2	30.3
4339	18.1	21.5
4892	30	30.7
4668	27.8	30.7
4867	20	20.9
4691	17.5	20.4
3586	18	20
3585	27	29
3614	21.5	20.4
3782	18.7	21.8
3767	32	32.7
3824	24.4	26.6
3917	27.1	28.3
3997	32.3	33.4
4091	21	22
4092	27	28.9
4215	15	17.1
	LDT-E	BD MAX-E	rank LDT	rank BD MAX
	28.5	35.3	3	1
	23.1	31.1	7	4
	19.95	25.1	9	8
	19.2	23	10	10
	31.6	34.1	1	2
	21.01	24.2	8	9
	24.93	29.3	6	6
	26.27	28.2	4.5	7
	26.27	30.5	4.5	5
	29.32	32.8	2	3
		Spearman correlation	0.857147
